# Supplementary material for: ORCHIDEE MICT-LEAK (r5459), a global model for the production, transport and transformation of dissolved organic carbon from Arctic permafrost regions, Part 2: Model evaluation over the Lena River basin
Source: Copernicus journal article supplement (doi:10.5194/gmd-2018-322), 2019-03-25
Supplement: Supplementary file [file gmd-2018-322-AC2-supplement.pdf]

1 **Supplement of**

2  
3 **ORCHIDEE MICT-LEAK (r5459), a global model for the production, transport and**  
4 **transformation of dissolved organic carbon from Arctic permafrost regions, Part**  
5 **2: Model evaluation over the Lena River basin.**

6  
7 **Authors:**

8 **S.P.K. Bowring<sup>1</sup>, R. Lauerwald<sup>2</sup>, B. Guenet<sup>1</sup>, D. Zhu<sup>1</sup>, M. Guimberteau<sup>1,3</sup>, P. Regnier<sup>2</sup>,**  
9 **A. Tootchi<sup>3</sup>, A. Ducharne<sup>3</sup>, P. Ciais<sup>1</sup>**

10  
11 **Affiliations:**

12 [1] Laboratoire des Sciences du Climat et de l'Environnement, LSCE, CEA, CNRS, UVSQ,  
13 91191 Gif Sur Yvette, France

14 [2] Department of Geoscience, Environment & Society, Université Libre de Bruxelles,  
15 Bruxelles, Belgium

16 [3] Sorbonne Université, CNRS, EPHE, Milieux environnementaux, transferts et  
17 interaction dans les hydrosystèmes et les sols, Metis, 75005 Paris, France

18  
19 **Text S1: Groundwater DOC Concentrations**

20  
21 The high groundwater reservoir DOC concentrations simulated in high altitude regions  
22 by ORCHIDEE MICT-L is related to the fact that, in the model, DOC is rapidly produced  
23 and infiltrated deep into soil above the permafrost table, to the point that it reaches the  
24 simulated groundwater pool relatively quickly, allowing it to enter this reservoir before  
25 being metabolised through the soil column –hence allowing for the relatively high  
26 groundwater concentrations found in mountain areas. Because of the prevailing low  
27 temperatures, this DOC is not quickly decomposed by microbes and instead feed the  
28 groundwater DOC pool.

29  
30  
31 **Text S2: Evaluation of Simulated NPP and Soil Respiration**

32  
33 Rates of yearly net primary production (NPP) for Russian and Siberian forests have been  
34 inferred in situ from eddy flux and inventory techniques to range from 123-250 gC m<sup>-2</sup>  
35 yr<sup>-1</sup> (Beer et al., 2006; Lloyd et al., 2002; Roser et al., 2002; Schulze et al., 1999;  
36 Shvidenko and Nilsson, 2003). We likewise simulate a broad range of NPP carbon  
37 uptake rates, of 61-469 gC m<sup>-2</sup> yr<sup>-1</sup> averaged per grid cell over the Lena basin, with a  
38 mean value of 210 gC m<sup>-2</sup> yr<sup>-1</sup>. NPP is heterogeneously distributed over space and  
39 between PFTs (SI, Fig. S5c), with forests averaging 90 gC m<sup>-2</sup> yr<sup>-1</sup> and grasslands  
40 averaging 104 gC m<sup>-2</sup> yr<sup>-1</sup> over the basin as a whole. Low values tended to originate in  
41 basin grid cells with elevated topography or high mean slope, while the maximum value  
42 was standalone, exceeding the next greatest by ~100 gC m<sup>-2</sup> yr<sup>-1</sup>, and is most likely  
43 caused by the edge effects of upscaling a coastal gridcell's small fraction of terrestrial  
44 area where high productivity occurs in a small plot, to the grid cell as a whole. By  
45 evaluating NPP we are also evaluating at a secondary level litter production, which is at  
46 a third level a major component of DOC production.

47  
48 Taken as a whole, gross primary production (GPP) was performed under simulations by  
49 four PFT groups, with the largest basin-wide bulk contributions coming from boreal

50 needleleaf summer-green trees and C3 grasses (SI, Fig. S5a), the highest GPP uptake  
 51 rates (3 TgC pixel<sup>-1</sup> yr<sup>-1</sup>) generated by boreal needleleaf evergreen trees, and the  
 52 remainder of GPP contributed by Boreal broad-leaved summer-green trees (SI, Fig. S5a).  
 53

54 Soil respiration rates, of combined soil heterotroph and plant root respiration in our  
 55 Control simulation, averaged 208 gC m<sup>-2</sup> yr<sup>-1</sup> (0.57 gC m<sup>-2</sup> d<sup>-1</sup>) over the Lena basin over  
 56 the period 1990-2000, which is somewhat higher than those found by Elberling (2007)  
 57 in tundra soils over Svalbard, of 103-176 gC m<sup>-2</sup> yr<sup>-1</sup> (0.28-0.48 gC m<sup>-2</sup> d<sup>-1</sup>). Sawamoto, et  
 58 al. (2000) measured in situ summertime soil respiration over the central Lena basin and  
 59 found rates of 1.6-34 gC m<sup>-2</sup> d<sup>-1</sup>, while Sommerkorn (2008) observed rates of 0.1-3.9 gC  
 60 m<sup>-2</sup> d<sup>-1</sup> at higher latitudes, these appearing to vary with vegetation and fire history,  
 61 water table depth and temperature. Mean heterotrophic respiration rates of 1.6 gC m<sup>-2</sup>  
 62 d<sup>-1</sup> are simulated here during July and August, in the range 0.05-2.2 gC m<sup>-2</sup> d<sup>-1</sup> for each of  
 63 the above PFT groups. The spatial distribution of, and difference in respiration rates  
 64 between PFT groups largely mirrors those for NPP (SI Fig. S5c), with maximum rates of  
 65 1.4 gC m<sup>2</sup> d<sup>-1</sup> over forested sites, versus a maximum of 2.2 gC m<sup>2</sup> d<sup>-1</sup> over  
 66 grassland/tundra sites (SI, Fig. S5b).  
 67

68 Aggregated over the basin, results show that increases over the course of the 20<sup>th</sup>  
 69 Century were simulated for NPP, GPP, River Discharge, DOC, CO<sub>2(aq.)</sub>, autotrophic and  
 70 heterotrophic respiration and CO<sub>2</sub> evasion, with percentage changes in the last versus  
 71 first decade of +25%, +27%, 38%, +73%, +60%, +30%, +33% and +63%, respectively.  
 72 (Fig. S7). It thus appears that rising temperatures and CO<sub>2</sub> concentrations  
 73 disproportionately favoured the metabolism of carbon within the soil and its  
 74 transport and mineralisation within the water column, fed by higher rates of primary  
 75 production and litter formation as well as an accelerated hydrological cycle.  
 76  
 77  
 78  
 79

80 **Table S1:** Data type, name and sources of data files used to drive the model in the study  
 81 simulations.  
 82  
 83

| Data Type                | Name                                  | Source                                                                                                                                               |
|--------------------------|---------------------------------------|------------------------------------------------------------------------------------------------------------------------------------------------------|
| Vegetation Map           | ESA CCI Land Cover Map                | (Bontemps et al., 2013)                                                                                                                              |
| Topographic Index        | STN-30p                               | (Vorosmarty et al., 2000)                                                                                                                            |
| Stream flow direction    | STN-30p                               | Vörösmarty et al., 2000                                                                                                                              |
| River surface area       |                                       | (Lauerwald et al., 2015)                                                                                                                             |
| Soil texture class       |                                       | (Reynolds et al., 1999)                                                                                                                              |
| Climatology              | GSWP3 v0, 1 degree                    | <a href="http://hydro.iis.u-tokyo.ac.jp/GSWP3/">http://hydro.iis.u-tokyo.ac.jp/GSWP3/</a>                                                            |
| Potential floodplains    | Multi-source global wetland maps      | (Tootchi et al., 2019)                                                                                                                               |
| Poor soils               | Harmonized World Soil Database map    | (Nachtergaele, Freddy, Harrij van Velthuisen, Luc Verelst, N. H. Batjes, Koos Dijkshoorn, V. W. P. van Engelen, Guenther Fischer, Arwyn Jones, 2010) |
| Spinup Soil Carbon Stock | 20ky ORCHIDEE-MICT soil carbon spinup | (Guimberteau et al., 2018)                                                                                                                           |

84  
 85 **Table S2:** Literature sources for empirical evaluation of model output.  
 86

| Empirical Evaluation Sources |                                                                                                                                                                    |
|------------------------------|--------------------------------------------------------------------------------------------------------------------------------------------------------------------|
| DOC Discharge                | Cauwet and Sidorov (1996); Dolman et al. (2012); Holmes et al. (2012); Lara et al. (1998); Raymond et al. (2007); Semiletov et al. (2011); Kutscher et al. (2017). |
| Water Discharge              | Ye et al. (2009); Lammers et al. (2001)                                                                                                                            |
| DOC concentration            | Shvartsev (2008); Denfeld et al. (2013); Mann et al. (2015); Raymond et al. (2007); Semiletov et al. (2011); Arctic-GRO/PARTNERS (Holmes et al., 2012)             |
| NPP                          | Beer et al. (2006); Lloyd et al. (2002); Roser et al. (2002); Schulze et al. (1999); Shvidenko and Nilsson, (2003)                                                 |
| Soil Respiration             | Elberling (2007); Sawamoto et al. (2000); Sommerkorn (2008).                                                                                                       |
| CO2 Evasion                  | Denfeld et al. (2013); Serikova et al. (2018).                                                                                                                     |

87  
88  
89  
90  
91  
92

**Table S3:** Observed versus simulated DOC discharge (1998-2007), where we compare the output of two separate climatological datasets used as input to the model (GSWP3 and ISIMIP 2b). Also shown are the simulated versus observed DOC discharge for the six largest Arctic rivers (the "Big Six") and for the Pan-Arctic as a whole.

|            | Simulated DOC to Ocean | Simulated DOC to Ocean | Observations (Holmes et al., 2012) |
|------------|------------------------|------------------------|------------------------------------|
|            | GSWP3                  | ISIMIP 2b              | PARTNERS/Arctic-GRO                |
| Lena       | 3.16                   | 4.14                   | 5.68                               |
| Big 6      |                        | 19.36                  | 18.11                              |
| Pan-Arctic |                        | 32.06                  | 34.04                              |

93  
94  
95

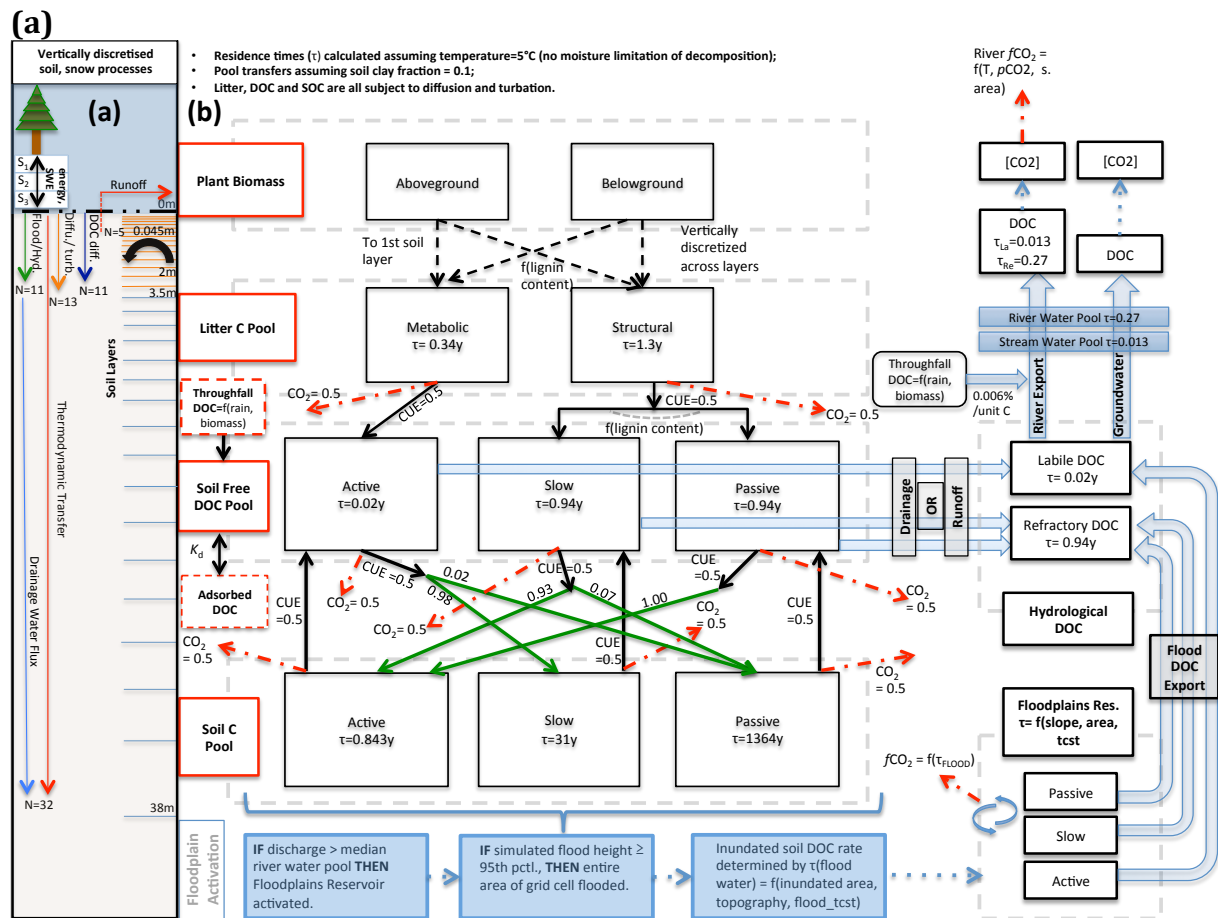

96

97 (c)

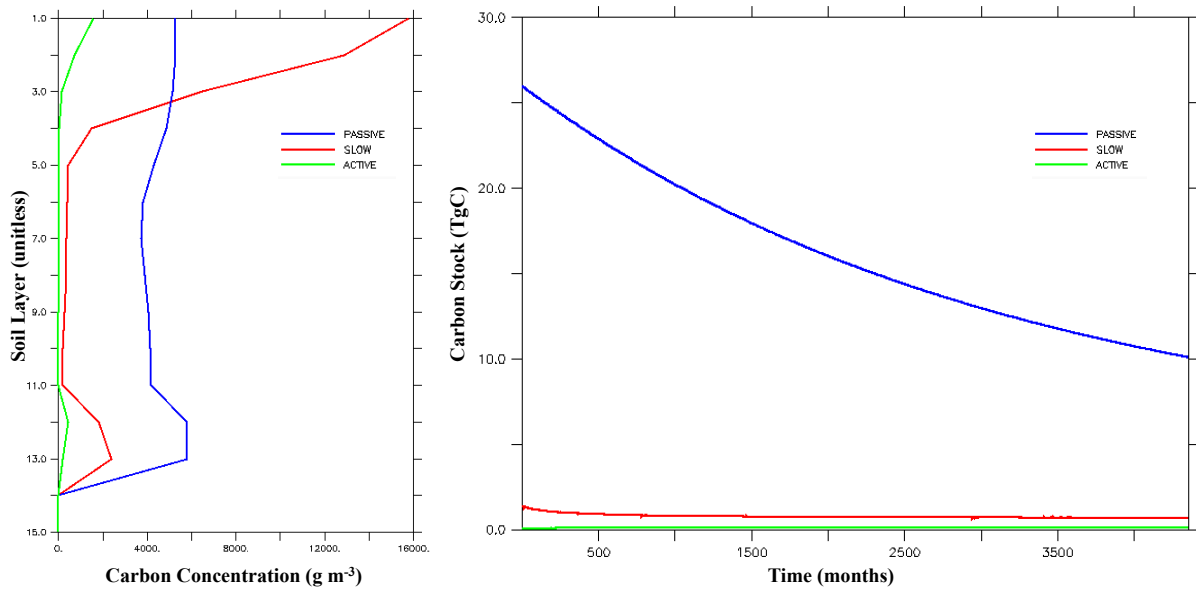

98  
 99 **Figure S1: (a-b)** Carbon and water flux map for core DOC elements in model structure  
 100 relating to DOC transport and transformation, first published in Part 1 of this study. **(a)**  
 101 Summary of the differing extent of vertical discretisation of soil and snow for different  
 102 processes calculated in the model. Discretisation occurs along 32 layers whose thickness  
 103 increases geometrically from 0-38m. N refers to the number of layers, SWE=snow water  
 104 equivalent,  $S_n$  = Snow layer n. Orange layers indicate the depth to which diffusive carbon  
 105 (turbation) fluxes occur. **(b)** Conceptual map of the production, transfer and  
 106 transformation of carbon in its vertical and lateral (i.e., hydrological) flux as calculated  
 107 in the model. Red boxes indicate meta-reservoirs of carbon, black boxes the actual pools  
 108 as they exist in the model. Black arrows indicate carbon fluxes between pools, dashed  
 109 red arrows give carbon loss as  $\text{CO}_2$ , green arrows highlight the fractional distribution of  
 110 DOC to SOC (no carbon loss incurred in this transfer), a feature of this model. For a given  
 111 temperature ( $5^\circ\text{C}$ ) and soil clay fraction, the fractional fluxes between pools are given  
 112 for each flux, while residence times for each pool ( $\tau$ ) are in each box. The association of  
 113 carbon dynamics with the hydrological module are shown by the blue arrows. Blue  
 114 coloured boxes illustrate the statistical sequence which activates the boolean  
 115 floodplains module. Note that for readability, the generation and lateral flux of  
 116 dissolved  $\text{CO}_2$  is omitted from this diagram, but is described at length in the Methods  
 117 section. **(c)** (Left) Soil carbon concentrations per depth level for each soil carbon  
 118 reactivity pool at the end of the spinup period. (Right) Evolution of each soil carbon pool  
 119 over the course of the 400-year spinup quasi-equilibration period.  
 120

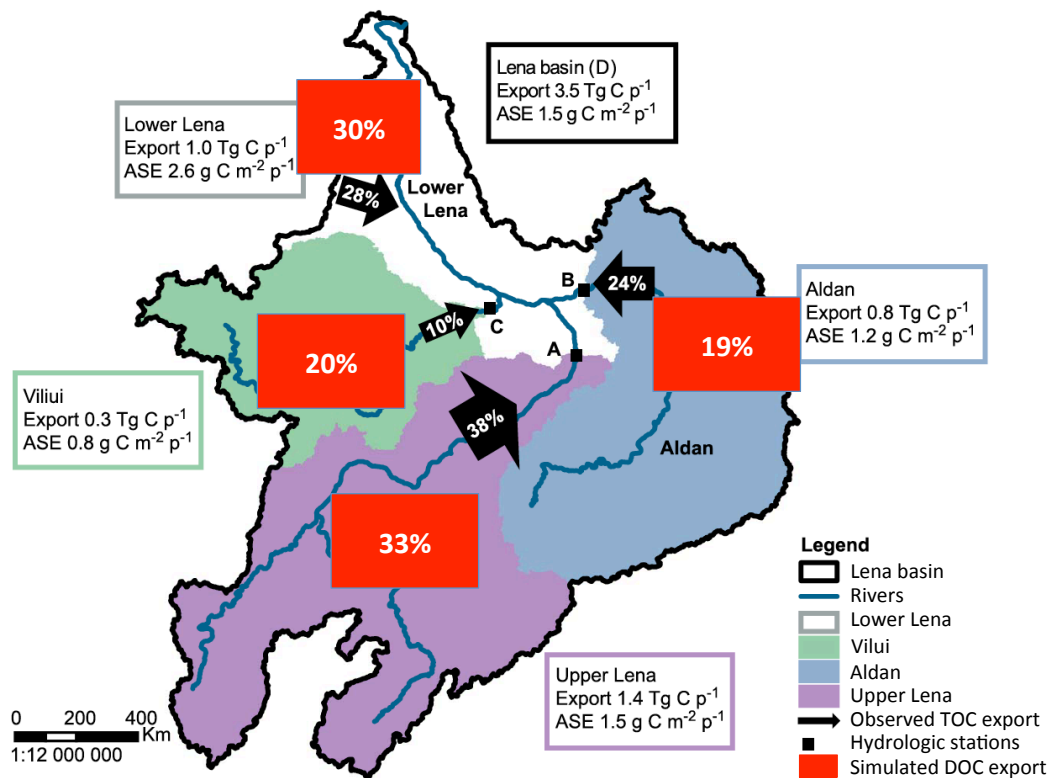

121  
 122  
 123  
 124  
 125  
 126  
 127  
 128  
 129  
 130  
 131  
 132  
 133  
 134  
 135

**Figure S2:** Map adapted from Fig. 2 in Kutscher et al. (2017) showing proportional sub-basin contributions of TOC outflow to total TOC discharge in June and July (designated as their sampling period 'p<sup>-1</sup>') of 2012-2013, as observed in Kutscher et al., 2017 (black arrows), and DOC export contributions as simulated over the period 1998-2007 by ORCHIDEE MICT-L (red boxes). Simulation pixels used in the calculation are correlates of the real-world sampling locations unless the site coordinates deviated from a mainstem hydrographic flowpath pixel –in which case a nearest 'next-best' pixel was used. Here the percentages are out of the summed mean bulk DOC flow of each tributary, not the mean DOC discharge from the river mouth, because doing so would negate the in-stream loss of DOC via degradation to CO<sub>2</sub> while in-stream.

136

(a)

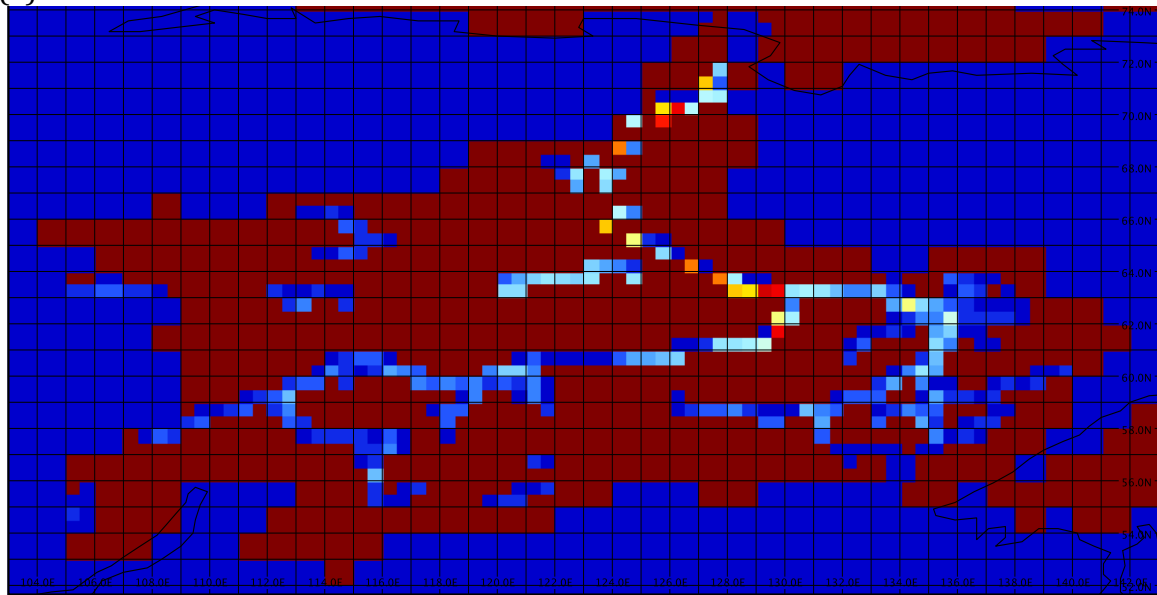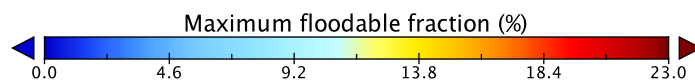

137

138

(b)

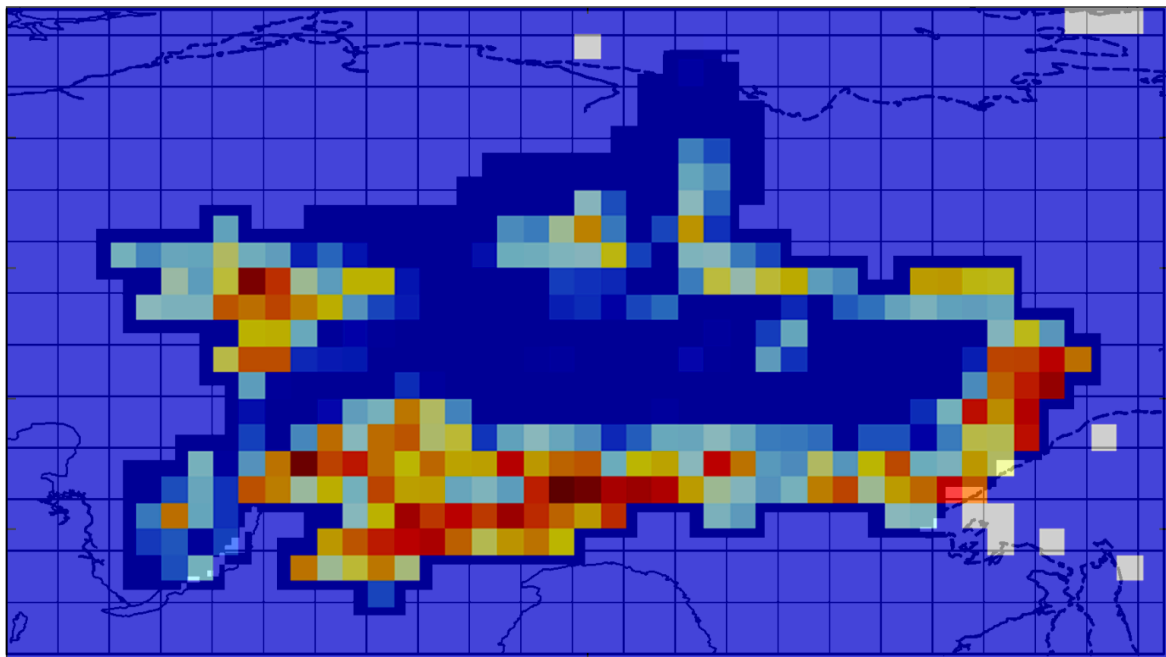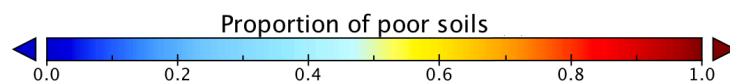

139

140

141

142

143

144

145

**Figure S3:** (a) Maximum floodable fraction of grid cells for the Lena basin per the input map from Tootchi et al. (2018). (b) Podzol and Arenosol map (Nachtergaele, Freddy, Harrij van Velthuisen, Luc Verelst, N. H. Batjes, Koos Dijkshoorn, V. W. P. van Engelen, Guenther Fischer, Arwyn Jones, 2010) used as input to the 'poor soils' module, basin mask in the background.

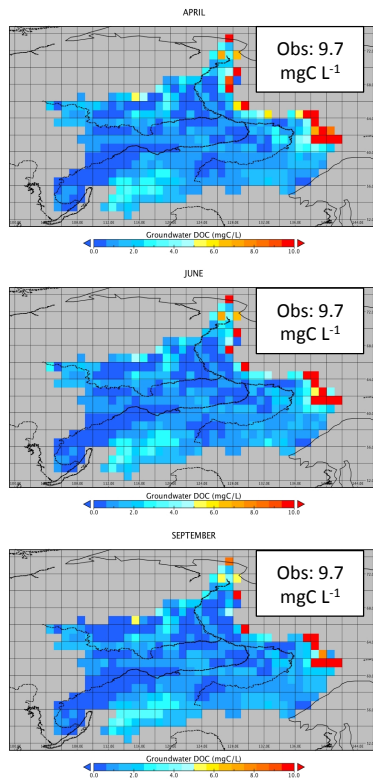

146  
147  
148  
149  
150  
151

**Figure S4:** Groundwater DOC concentrations over the Lena basin for April, June and September averaged over 1998-2007, with mean observed concentrations for permafrost groundwater inset.

(a)

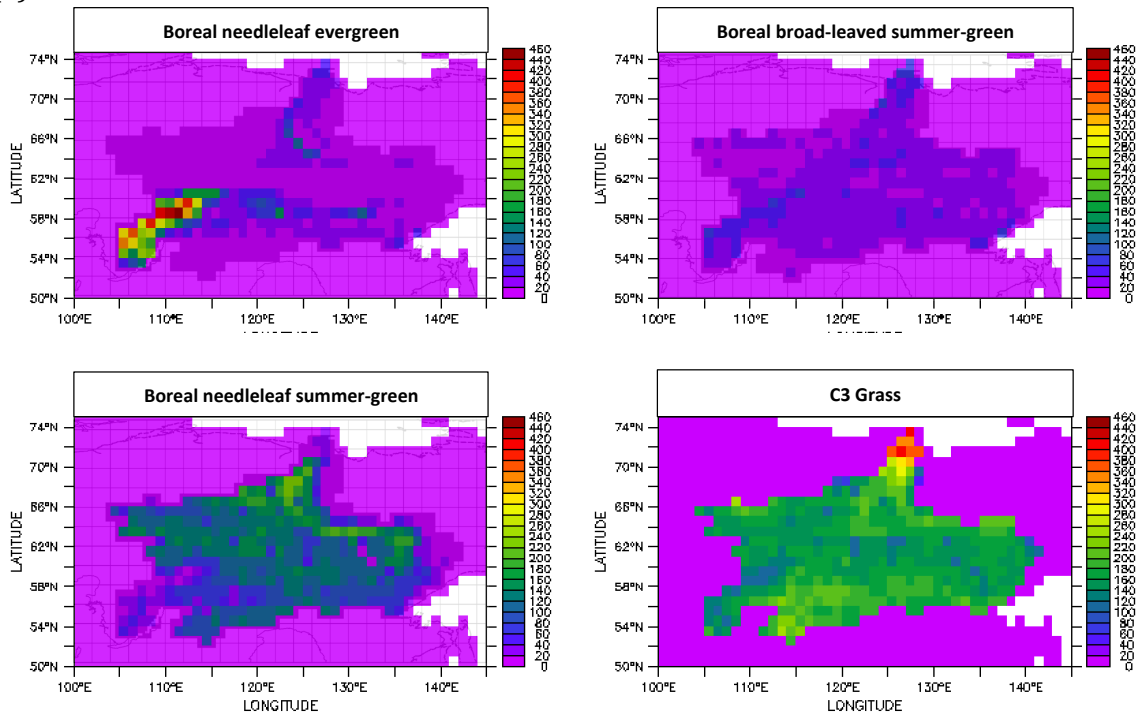

152  
153

(b)

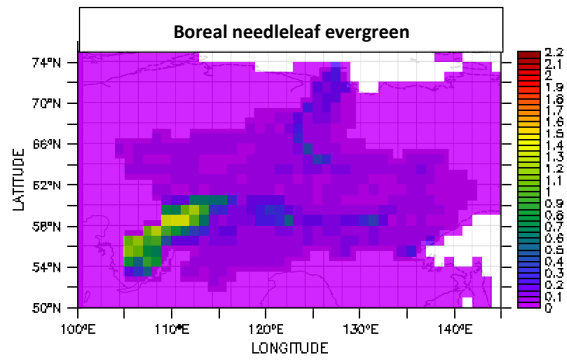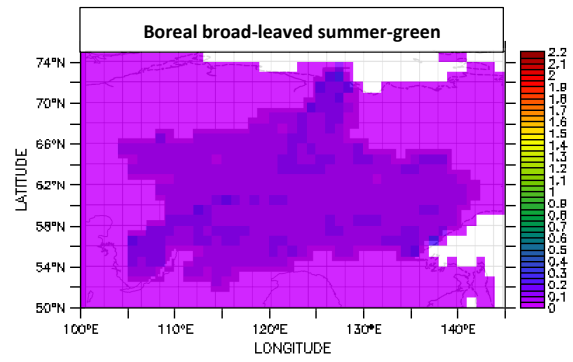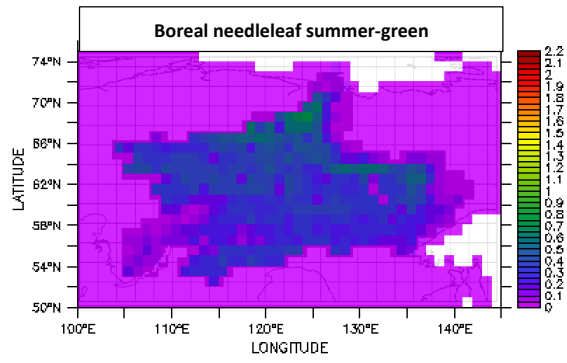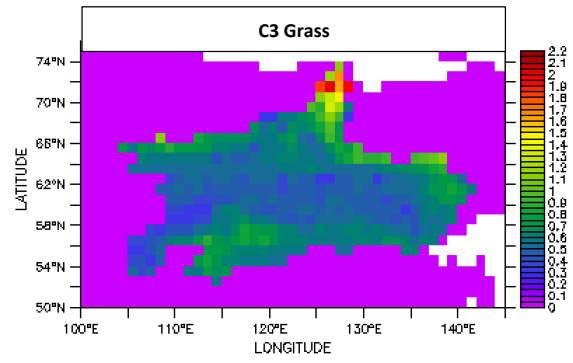

154  
155

(c)

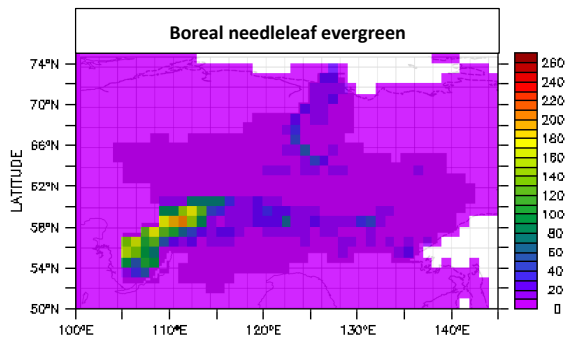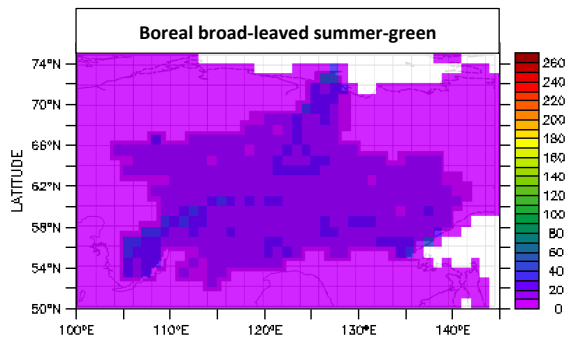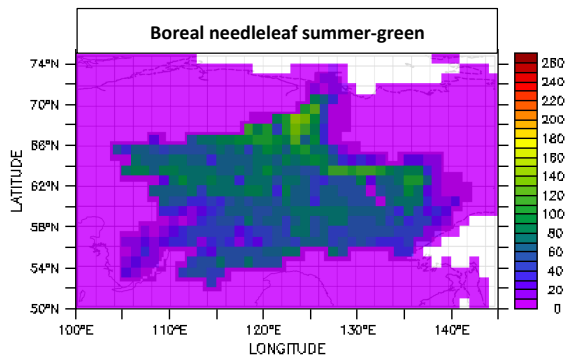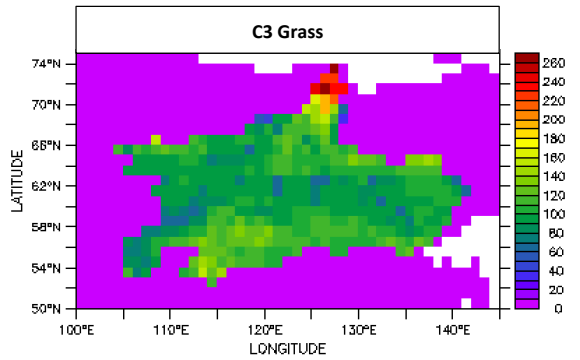

156  
157

(d)



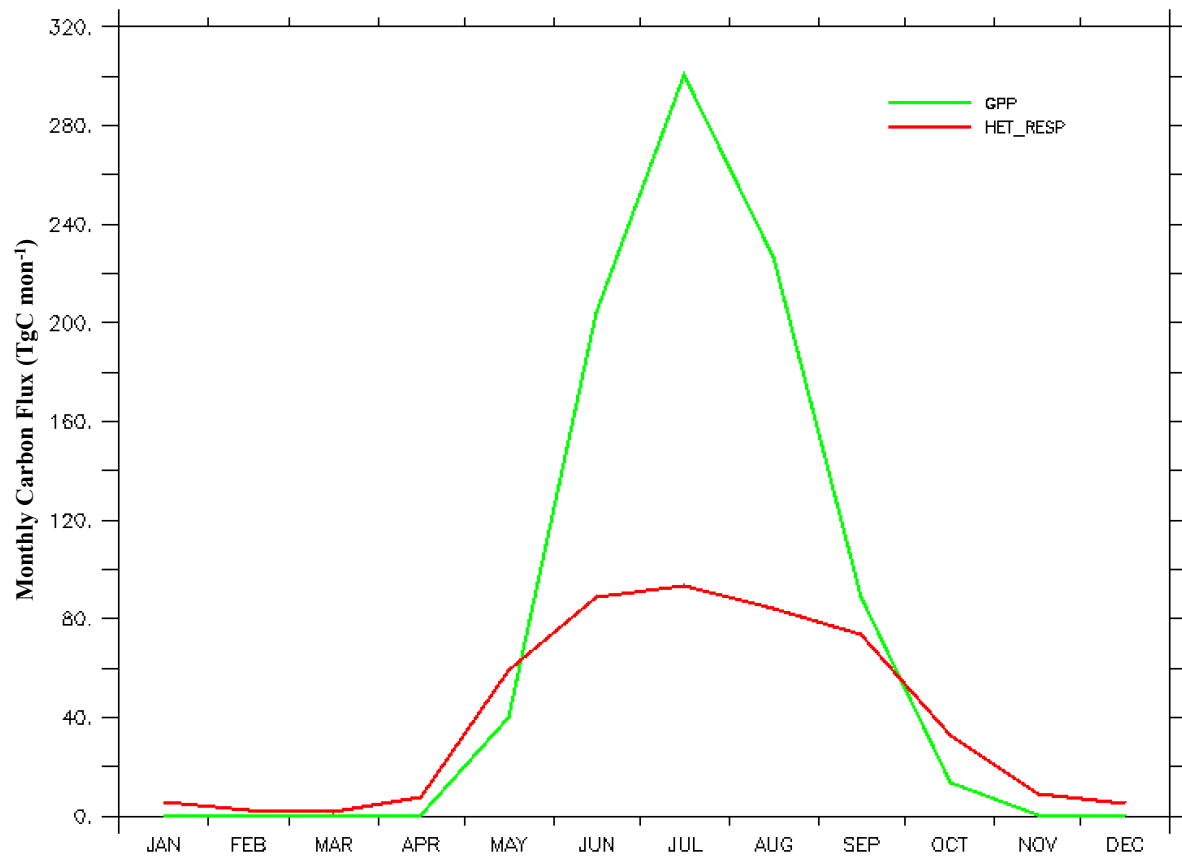

158  
 159  
 160  
 161  
 162  
 163  
 164  
 165  
 166

**Figure S5:** (a) Absolute yearly gross primary productivity (GPP, TgC yr<sup>-1</sup>) for the four relevant PFT groups over the Lena basin, averaged over 1998-2007. (b) Mean July and August soil heterotrophic respiration rates (g m<sup>2</sup> d<sup>-1</sup>) for the same PFT groups as in (a), during the period 1998-2007. (c) Average yearly NPP (gC m<sup>2</sup> yr<sup>-1</sup>) averaged over the period 1998-2007. All maps have the Lena basin area shaded in the background. (d) Mean monthly carbon uptake (GPP) versus its heterotrophic respiration from the soil (Het\_Res) in TgC per month, over the period 1998-2007.

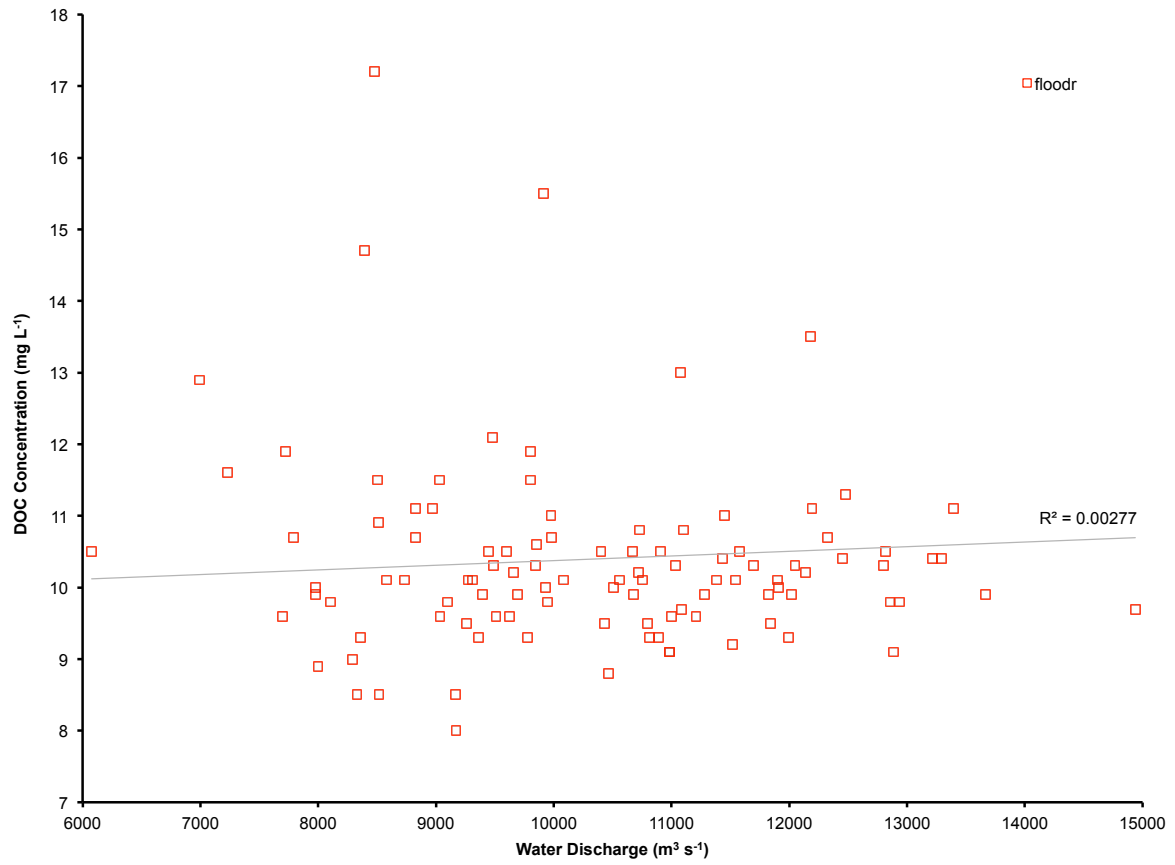

167  
168  
169  
170  
171

**Figure S6:** Simulated basin-mean annual DOC concentrations (mg L<sup>-1</sup>) for the floodplain water pool regressed against mean annual simulated discharge rates at Kusur (m<sup>3</sup> s<sup>-1</sup>) over 1901-2007. A linear regression with R<sup>2</sup> is plotted.

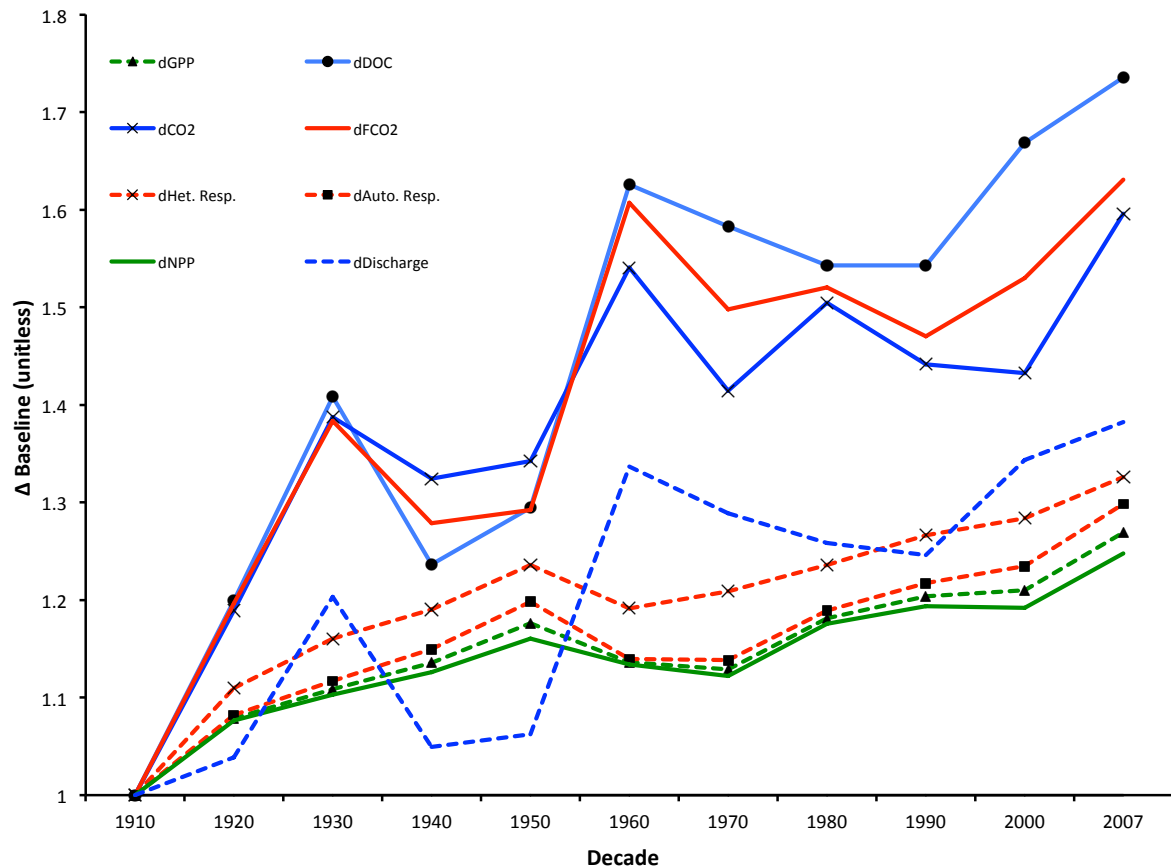

172  
173  
174  
175  
176  
177  
178

**Figure S7:** Time series showing the decadal-mean fractional change in carbon fluxes normalised to a 1901-1910 average baseline (=1 on the y-axis) for NPP, GPP, autotrophic and heterotrophic respiration, DOC inputs to the water column, CO<sub>2</sub> inputs to the water column, CO<sub>2</sub> evasion from the water surface (FCO<sub>2</sub>), and discharge.

179 **References**

180  
181  
182  
183  
184  
185  
186  
187  
188  
189  
190  
191  
192  
193  
194  
195  
196  
197

Beer, C., Lucht, W., Schmullius, C. and Shvidenko, A.: Small net carbon dioxide uptake by Russian forests during 1981-1999, *Geophys. Res. Lett.*, doi:10.1029/2006GL026919, 2006.

Bontemps, S., Defourny, P., Radoux, J., Van Bogaert, E., Lamarche, C., Achard, F., Mayaux, P., Boettcher, M., Brockmann, C., Kirches, G., Zülkhe, M., Kalogirou, V., Seifert, F. and Arino, O.: Consistent global land cover maps for climate modelling communities: current achievements of the ESA' and cover CCI, in *ESA Living Planet Symposium 2013*, pp. 9–13., 2013.

Elberling, B.: Annual soil CO<sub>2</sub> effluxes in the High Arctic: The role of snow thickness and vegetation type, *Soil Biol. Biochem.*, doi:10.1016/j.soilbio.2006.09.017, 2007.

Guimberteau, M., Zhu, D., Maignan, F., Huang, Y., Yue, C., Dantec-N d lec, S., Ottl, C., Jornet-Puig, A., Bastos, A., Laurent, P., Goll, D., Bowring, S., Chang, J., Guenet, B., Tifafi, M., Peng, S., Krinner, G., Ducharne, A. s., Wang, F., Wang, T., Wang, X., Wang, Y., Yin, Z., Lauerwald, R., Joetzjer, E., Qiu, C., Kim, H. and Ciais, P.: ORCHIDEE-MICT (v8.4.1), a land surface model for the high latitudes: model description and validation, *Geosci. Model Dev.*, 11(1), 121–163, doi:10.5194/gmd-11-121-2018, 2018.

Lauerwald, R., Laruelle, G. G., Hartmann, J., Ciais, P. and Regnier, P. A. G.: Spatial patterns

198 in CO<sub>2</sub> evasion from the global river network, *Global Biogeochem. Cycles*,  
199 doi:10.1002/2014GB004941, 2015.

200 Lloyd, J., Shibistova, O., Zolotoukhine, D., Kolle, O., Arneth, A., Wirth, C., Styles, J. M.,  
201 Tchebakova, N. M. and Schulze, E. D.: Seasonal and annual variations in the  
202 photosynthetic productivity and carbon balance of a central Siberian pine forest, *Tellus*,  
203 Ser. B Chem. Phys. Meteorol., doi:10.1034/j.1600-0889.2002.01487.x, 2002.

204 Nachtergaele, Freddy, Harrij van Velthuizen, Luc Verelst, N. H. Batjes, Koos Dijkshoorn,  
205 V. W. P. van Engelen, Guenther Fischer, Arwyn Jones, and L. M.: The harmonized world  
206 soil database, Proc. 19th World Congr. Soil Sci. Soil Solut. a Chang. World, Brisbane, Aust.  
207 1-6 August 2010, pp. 34-37., 34–37 [online] Available from:  
208 <https://library.wur.nl/WebQuery/wurpubs/fulltext/154132>, 2010.

209 Reynolds, C. A., Jackson, T. J. and Rawls, W. J.: Estimating soil water-holding capacities by  
210 linking the Food and Agriculture Organization soil map of the world with global pedon  
211 databases and continuous pedotransfer functions, *Water Resour. Res.*, 36(12), 3653–  
212 3662, doi:10.1029/2000WR900130, 1999.

213 Roser, C., Montagnani, L., Schulze, E.-D., Mollicone, D., Kolle, O., Meroni, M., Papale, D.,  
214 Marchesini, L. B., Federici, S. and Valentini, R.: Net CO<sub>2</sub> exchange rates in three different  
215 successional stages of the “Dark Taiga” of central Siberia, *Tellus B*, doi:10.1034/j.1600-  
216 0889.2002.01351.x, 2002.

217 Sawamoto, T., Hatano, R., Yajima, T., Takahashi, K. and Isaev, A. P.: Soil respiration in  
218 siberian taiga ecosystems with different histories of forest fire, *Soil Sci. Plant Nutr.*,  
219 doi:10.1080/00380768.2000.10408759, 2000.

220 Schulze, E. D., Lloyd, J., Kelliher, F. M., Wirth, C., Rebmann, C., Luhker, B., Mund, M., Knohl,  
221 A., Milyukova, I. M., Schulze, W., Ziegler, W., Varlagin, A. B., Sogachev, A. F., Valentini, R.,  
222 Dore, S., Grigoriev, S., Kolle, O., Panfyorov, M. I., Tchebakova, N. and Vygodskaya, N. N.:  
223 Productivity of forests in the eurosiberian boreal region and their potential to act as a  
224 carbon sink - a synthesis, *Glob. Chang. Biol.*, doi:10.1046/j.1365-2486.1999.00266.x,  
225 1999.

226 Shvidenko, A. and Nilsson, S.: A synthesis of the impact of Russian forests on the global  
227 carbon budget for 1961-1998, *Tellus*, Ser. B Chem. Phys. Meteorol., doi:10.1034/j.1600-  
228 0889.2003.00046.x, 2003.

229 Sommerkorn, M.: Micro-topographic patterns unravel controls of soil water and  
230 temperature on soil respiration in three Siberian tundra systems, *Soil Biol. Biochem.*,  
231 doi:10.1016/j.soilbio.2008.03.002, 2008.

232 Tootchi, A., Jost, A. and Ducharne, A.: Multi-source global wetland maps combining  
233 surface water imagery and groundwater constraints, *Earth Syst. Sci. Data*, 11, 189–220,  
234 doi:10.5194/essd-11-189-2019, 2019.

235 Vorosmarty, C. J., Fekete, B. M., Meybeck, M. and Lammers, R. B.: Global system of rivers:  
236 Its role in organizing continental land mass and defining land-To-Ocean linkages, *Global*  
237 *Biogeochem. Cycles*, 14(2), 599–621, doi:10.1029/1999GB900092, 2000.

238
